# Supplementary material
Source: ML conference proceedings conference paper supplement (https://openreview.net/forum?id=9NzC3PjpAt)
Supplement: supplementary_material [file attachment]

# 1 A Environment Details

## 2 A.1 Game Introduction

3 MOBA (Multiplayer Online Battle Arena) games, characterized by multi-agent cooperation and  
 4 competition mechanisms, long time horizons, enormous state-action spaces ( $10^{20000}$ ), and imperfect  
 5 information (OpenAI *et al.*, 2019; Ye *et al.*, 2020), have attracted much attention from researchers.  
 6 *Honor of Kings* is a renowned MOBA game played by two opposing teams on the same symmetrical  
 7 map, each comprising five players. The game environment depicted in Figure 1 comprises the  
 8 main hero with peculiar skill mechanisms and attributes, controlled by each player. The player can  
 9 maneuver the hero’s movement using the bottom-left wheel (C.1) and release the hero’s skills through  
 10 the bottom-right buttons (C.2, C.3). The player can view the local environment on the screen, the  
 11 global environment on the top-left mini-map (A), and access game stats on the top-right dashboard  
 12 (B). Players of each camp compete for resources through team confrontation and collaboration, etc.,  
 13 with the task goal of winning the game by destroying the opposing team’s crystal. The gaming  
 14 experience is vital to a player’s engagement and satisfaction. Along with the task goal, players  
 15 also pursue multiple individual goals (see Appendix D.2.3), such as achieving a higher MVP score,  
 16 experiencing more highlight moments, and obtaining more in-game resources, among others. The  
 17 pursuit of these goals can contribute to a more enjoyable and rewarding gaming experience.

18 For fair comparisons, all experiments in this paper were carried out using a fixed released game  
 19 engine version (Version 8.2 series) of *Honor of Kings*.

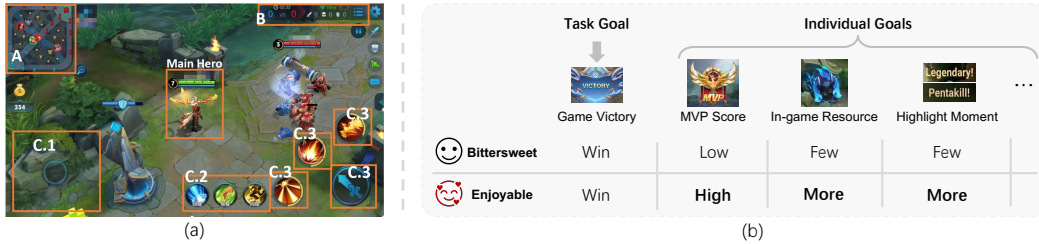

Figure 1: (a) The UI interface of *Honor of Kings*. (b) The player’s goals in-game.

## 20 A.2 Hero Pool

21 Table 1 shows the full hero pool used in Experiments. Each match involves two camps playing against  
 22 each other, and each camp consists of five randomly picked heroes.

Table 1: Hero pool used in Experiments.

|                |                                                                                                                                                                                                                                                                                                                                                                                                                                                                                                                                                                                                                                                                                                                                                                                                                                                                                                                                                                                                                                                                                                                                                                                                                             |
|----------------|-----------------------------------------------------------------------------------------------------------------------------------------------------------------------------------------------------------------------------------------------------------------------------------------------------------------------------------------------------------------------------------------------------------------------------------------------------------------------------------------------------------------------------------------------------------------------------------------------------------------------------------------------------------------------------------------------------------------------------------------------------------------------------------------------------------------------------------------------------------------------------------------------------------------------------------------------------------------------------------------------------------------------------------------------------------------------------------------------------------------------------------------------------------------------------------------------------------------------------|
| Full Hero pool | Lian Po, Xiao Qiao, Zhao Yun, Mo Zi, Da Ji, Ying Zheng, Sun Shangxiang, Luban Qihao, Zhuang Zhou, Liu Chan, Gao Jianli, A Ke, Zhong Wuyan, Sun Bin, Bian Que, Bai Qi, Mi Yue, Lv Bu, Zhou Yu, Yuan Ge, Chengji Sihan, Xia Houdun, Zhen Ji, Cao Cao, Dian Wei, Gongben Wucang, Li Bai, Make Boluo, Di Renjie, Da Mo, Xiang Yu, Wu Zetian, Si Mayi, Lao Fuzi, Guan Yu, Diao Chan, An Qila, Cheng Yaojin, Lu Na, Jiang Ziya, Liu Bang, Chang E, Han Xin, Wang Zhaojun, Lan Lingwang, Hua Mulan, Ai Lin, Zhang Liang, Buzhi Huowu, Nake Lulu, Ju Youjing, Ya Se, Sun Wukong, Niu Mo, Hou Yi, Liu Bei, Zhang Fei, Li Yuanfang, Yu Ji, Zhong Kui, Yang Yuhuan, Zhu Bajie, Yang Jian, Nv Wa, Ne Zha, Ganjiang Moye, Ya Dianna, Cai Wenji, Taiyi Zhenren, Donghuang Taiyi, Gui Guzi, Zhu Geliang, Da Qiao, Huang Zhong, Kai, Su Lie, Baili Xuance, Baili Shouyue, Yi Xing, Meng Qi, Gong Sunli, Shen Mengxi, Ming Shiyin, Pei Qinhu, Kuang Tie, Mi Laidi, Yao, Yun Zhongjun, Li Xin, Jia Luo, Dun Shan, Sun Ce, Shanguan Waner, Ma Chao, Dong Fangyao, Xi Shi, Meng Ya, Luban Dashi, Pan Gu, Meng Tian, Jing, A Guduo, Xia Luote, Lan, Sikong Zhen, Erin, Yun ying, Jin Chan, Fei, Sang Qi, Ge Ya, Hai Yue, Zhao Huaizhen, Lai Xiao |
|----------------|-----------------------------------------------------------------------------------------------------------------------------------------------------------------------------------------------------------------------------------------------------------------------------------------------------------------------------------------------------------------------------------------------------------------------------------------------------------------------------------------------------------------------------------------------------------------------------------------------------------------------------------------------------------------------------------------------------------------------------------------------------------------------------------------------------------------------------------------------------------------------------------------------------------------------------------------------------------------------------------------------------------------------------------------------------------------------------------------------------------------------------------------------------------------------------------------------------------------------------|

# 23 B Framework Details

## 24 B.1 Infrastructure Design

25 Figure 2 shows the infrastructure of the training system (Ye *et al.*, 2020), which consists of four key  
 26 components: AI Server, Inference Server, RL Learner, and Memory Pool. The AI Server (the actor)

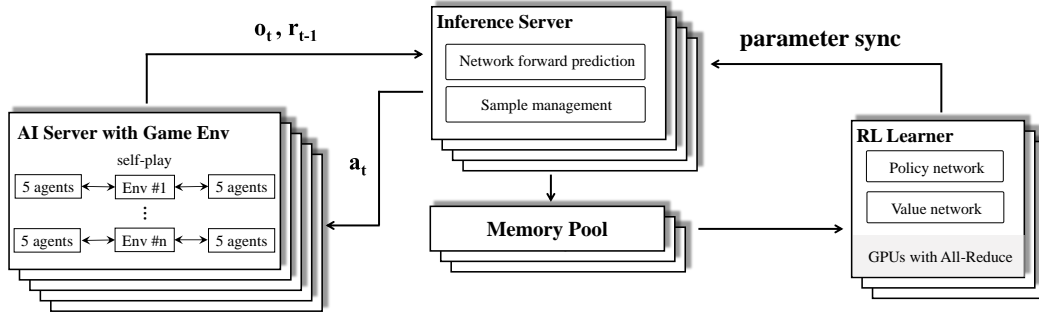

Figure 2: The infrastructure of the training system.

27 covers the interaction logic between the agents and the environment. The Inference Server is used for  
 28 the centralized batch inference on the GPU side. The RL Learner (the learner) is a distributed training  
 29 environment for RL models. And the Memory Pool is used for storing the experience, implemented  
 30 as a memory-efficient circular queue.

### 31 B.2 Task Reward Design

32 Table 2 demonstrates the details of the designed task reward from environment.

Table 2: The details of the environment reward.

| Head             | Reward Item            | Weight   | Type   | Description                                            |
|------------------|------------------------|----------|--------|--------------------------------------------------------|
| Farming Related  | Gold                   | 0.005    | Dense  | The gold gained.                                       |
|                  | Experience             | 0.001    | Dense  | The experience gained.                                 |
|                  | Mana                   | 0.05     | Dense  | The rate of mana (to the fourth power).                |
|                  | No-op                  | -0.00001 | Dense  | Stop and do nothing.                                   |
|                  | Attack monster         | 0.1      | Sparse | Attack monster.                                        |
| KDA Related      | Kill                   | 1        | Sparse | Kill a enemy hero.                                     |
|                  | Death                  | -1       | Sparse | Being killed.                                          |
|                  | Assist                 | 1        | Sparse | Assists.                                               |
|                  | Tyrant buff            | 1        | Sparse | Get buff of killing tyrant, dark tyrant, storm tyrant. |
|                  | Overlord buff          | 1.5      | Sparse | Get buff of killing the overlord.                      |
|                  | Expose invisible enemy | 0.3      | Sparse | Get visions of enemy heroes.                           |
| Damage Related   | Last hit               | 0.2      | Sparse | Last hitting an enemy minion.                          |
|                  | Health point           | 3        | Dense  | The health point of the hero (to the fourth power).    |
| Pushing Related  | Hurt to hero           | 0.3      | Sparse | Attack enemy heroes.                                   |
|                  | Attack turrets         | 1        | Sparse | Attack turrets.                                        |
| Win/Lose Related | Attack crystal         | 1        | Sparse | Attack enemy home base.                                |
|                  | Destroy home base      | 4        | Sparse | Destroy enemy home base.                               |

### 33 B.3 Human Goal Reward Design

34 Table 3 demonstrates the details of the designed human goal reward.

### 35 B.4 Feature Design

36 Table 4 shows the designed features of the Wukong agent (Ye et al., 2020), some of which (observable)  
 37 are used as human features.

Table 3: The details of the human goal reward.

| Head                  | Reward Item   | Weight | Type   | Description                                            |
|-----------------------|---------------|--------|--------|--------------------------------------------------------|
| MVP Score Related     | Kill          | 1      | Sparse | Kill an enemy hero.                                    |
|                       | Death         | -1     | Sparse | Being killed.                                          |
|                       | Assist        | 1      | Sparse | Assists.                                               |
|                       | Hurt to hero  | 0.3    | Sparse | Attack enemy heroes.                                   |
|                       | Health point  | 3      | Dense  | The health point of the hero (to the fourth power).    |
| Participation Related | Participation | 1      | Dense  | Percentage of players participating in the team fight. |
| Highlight Related     | Highlight     | 2      | Sparse | Double kill, triple kill, quadra kill, penta kill.     |
| Resource Related      | Buff          | 1      | Sparse | Get a red buff, blue buff.                             |
|                       | Health cake   | 1      | Sparse | Get a health cake.                                     |

Table 4: The observation space of agents. \* are used as human features.

| Feature Class                            | Field              | Description                                                                                                   | Dimension | Type                        |
|------------------------------------------|--------------------|---------------------------------------------------------------------------------------------------------------|-----------|-----------------------------|
| <b>1. Unit feature</b>                   | Scalar             | Includes heroes, minions, monsters, and turrets                                                               | 8599      |                             |
| Heroes*                                  | Status             | Current HP, mana, speed, level, gold, KDA, buff, bad states, orientation, visibility, etc.                    | 1842      | (one-hot, normalized float) |
|                                          | Position           | Current 2D coordinates                                                                                        | 20        | (normalized float)          |
|                                          | Attribute          | Is main hero or not, hero ID, camp (team), job, physical attack and defense, magical attack and defense, etc. | 1330      | (one-hot, normalized float) |
|                                          | Skills             | Skill 1 to Skill N's cool down time, usability, level, range, buff effects, bad effects, etc.                 | 2095      | (one-hot, normalized float) |
|                                          | Item               | Current item lists                                                                                            | 60        | (one-hot)                   |
| Minions                                  | Status             | Current HP, speed, visibility, killing income, etc.                                                           | 1160      | (one-hot, normalized float) |
|                                          | Position           | Current 2D coordinates                                                                                        | 80        | (normalized float)          |
|                                          | Attribute          | Camp (team)                                                                                                   | 80        | (one-hot)                   |
|                                          | Type               | Type of minions (melee creep, ranged creep, siege creep, super creep, etc.)                                   | 200       | (one-hot)                   |
| Monsters*                                | Status             | Current HP, speed, visibility, killing income, etc.                                                           | 868       | (one-hot, normalized float) |
|                                          | Position           | Current 2D coordinates                                                                                        | 56        | (normalized float)          |
|                                          | Type               | Type of monsters (normal, blue, red, tyrant, overlord, etc.)                                                  | 168       | (one-hot)                   |
| Turrets                                  | Status             | Current HP, locked targets, attack speed, etc.                                                                | 520       | (one-hot, normalized float) |
|                                          | Position           | Current 2D coordinates                                                                                        | 40        | (normalized float)          |
|                                          | Type               | Type of turrets (tower, high tower, crystal, etc.)                                                            | 80        | (one-hot)                   |
| <b>2. In-game stats feature</b>          | Scalar             | Real-time statistics of the game                                                                              | 68        |                             |
| Static statistics*                       | Time               | Current game time                                                                                             | 5         | (one-hot)                   |
|                                          | Gold               | Gold of two camps                                                                                             | 12        | (normalized float)          |
|                                          | Alive heroes       | Number of alive heroes of two camps                                                                           | 10        | (one-hot)                   |
|                                          | Kill               | Kill number of each camp (Segment representation)                                                             | 6         | (one-hot)                   |
|                                          | Alive turrets      | Number of alive turrets of two camps                                                                          | 8         | (one-hot)                   |
| Comparative statistics*                  | Gold diff          | Gold difference between two camps (Segment representation)                                                    | 5         | (one-hot)                   |
|                                          | Alive heroes diff  | Alive heroes difference between two camps                                                                     | 11        | (one-hot)                   |
|                                          | Kill diff          | Kill difference between two camps                                                                             | 5         | (one-hot)                   |
|                                          | Alive turrets diff | Alive turrets difference between two camps                                                                    | 6         | (one-hot)                   |
| <b>3. Invisible opponent information</b> | Scalar             | Invisible information used for the value net                                                                  | 560       |                             |
| Opponent heroes                          | Position           | Current 2D coordinates, distances, etc.                                                                       | 120       | (normalized float)          |
| NPC                                      | Position           | Current 2D coordinates of all non-player characters, including minions, monsters, and turrets                 | 440       | (normalized float)          |
| <b>4. Spatial feature</b>                | Spatial            | 2D image-like, extracted in channels for convolution                                                          | 7x17x17   |                             |
| Skills*                                  | Region             | Potential damage regions of ally and enemy skills                                                             | 2x17x17   |                             |
|                                          | Bullet*            | Bullets of ally and enemy skills                                                                              | 2x17x17   |                             |
| Obstacles*                               | Region             | Forbidden region for heroes to move                                                                           | 1x17x17   |                             |
| Bushes*                                  | Region             | Bush region for heroes to hide                                                                                | 1x17x17   |                             |
| Health cake*                             | Region             | Cake for heroes to recover blood                                                                              | 1x17x17   |                             |

38 **B.5 Action Design**

39 Table 5 shows the action space of agents.

Table 5: The action space of agents.

| Action | Detail              | Description                                                         |
|--------|---------------------|---------------------------------------------------------------------|
| What   | Illegal action      | Placeholder.                                                        |
|        | None action         | Executing nothing or stopping continuous action.                    |
|        | Move                | Moving to a certain direction determined by move x and move y.      |
|        | Normal Attack       | Executing normal attack to an enemy unit.                           |
|        | Skill1              | Executing the first skill.                                          |
|        | Skill2              | Executing the second skill.                                         |
|        | Skill3              | Executing the third skill.                                          |
|        | Skill4              | Executing the fourth skill (only a few heroes have Skill4).         |
|        | Summoner ability    | An additional skill choosing before the game begins (10 to choose). |
|        | Return home(Recall) | Returning to spring, should be continuously executed.               |
|        | Item skill          | Some items can enable an additional skill to player's hero.         |
| How    | Move X              | The x-axis offset of moving direction.                              |
|        | Move Y              | The y-axis offset of moving direction.                              |
|        | Skill X             | The x-axis offset of a skill.                                       |
|        | Skill Y             | The y-axis offset of a skill.                                       |
| Who    | Target unit         | The game unit(s) chosen to attack.                                  |

40 **B.6 Network Architecture**

41 Figure 3 shows the detailed network architecture of the RLHG agent, which consists of two parts: the  
 42 pre-trained Wukong model (Ye et al., 2020), and the human enhancement module.

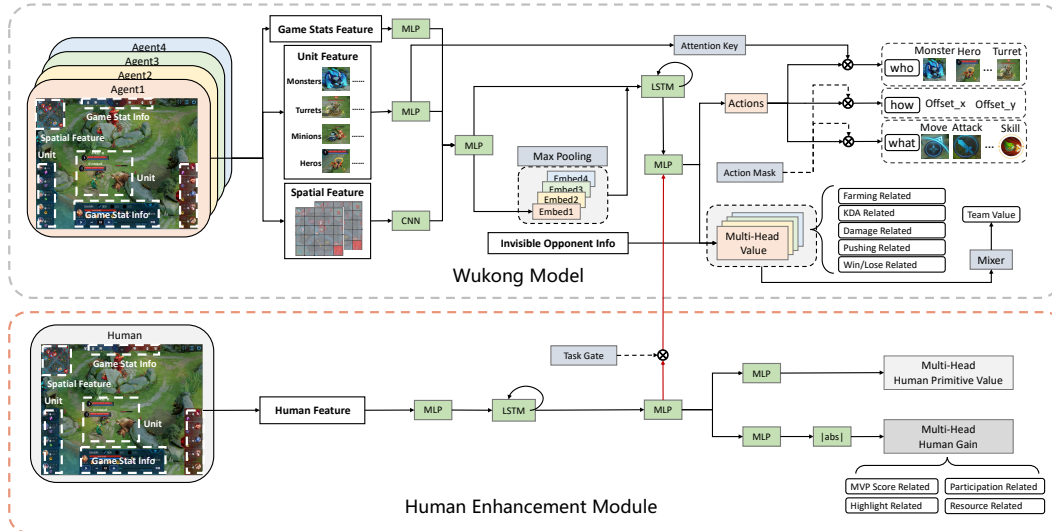

Figure 3: The network structure.

43 **Human Enhancement Module.** Human features are sequentially fed into the Fully-Connected  
 44 (FC) layers with LSTM (Hochreiter and Schmidhuber, 1997) to extract human policy embedding.  
 45 The policy embedding is used to predict human primitive values and gains. We apply the absolute  
 46 activation function to ensure that the gains are non-negative. To manage the uncertain value of  
 47 state-action in the game, we introduce the multi-head value estimation (Ye et al., 2020) into the  
 48 network by grouping the human goal reward in Table 3.

49 **Human Conditioned Policy Modeling.** We use surgery techniques (Chen et al., 2015; OpenAI et  
 50 al., 2019) to fuse the human policy embedding into the agent’s original network, i.e. adding more  
 51 randomly initialized units to an internal FC layer. The task gate is used to control the agent’s policy



52 style, i.e., for the non-enhancement mode, the task gate is set to 0, and for the enhancement mode,  
 53 the task gate is set to 1. The agent’s policy network predicts a sequence of actions for each agent  
 54 based on its observation and human policy embedding.

55 **Network Parameter Details.** All hyper-parameters of the Wukong model are consistent with the  
 56 original (Ye *et al.*, 2020). The unit size and step size of the LSTM module in the human enhancement  
 57 module are set to 4096 and 16, respectively. The parameters of each FC layer are shown in our code.  
 58 We use Adam (Kingma and Ba, 2014) with an initial learning rate of 0.0001 for fine-tuning.

## 59 C Supplementary Experiment

### 60 C.1 Ablation Study

61 We examine the influence of the balance parameter  $\alpha$ , i.e., the relative importance of human individual  
 62 goals relative to the task goal. The results of RLHG agents trained with different values of  $\alpha$  are  
 63 shown in Figure 4. We can see that with the increase of  $\alpha$ , the human model’s performance in  
 64 achieving individual goals is significantly improved, but the negative effect is that the agent sacrifices  
 65 its original ability to achieve the task goal (The Win Rate metric is reduced). We also notice that  
 66 when  $\alpha$  is too large, the Win Rate is significantly reduced, which will also have a negative impact on  
 67 the MVP score goal. We find that when  $\alpha$  is set to 2, it not only greatly improves the human model’s  
 68 performance in achieving individual goals, but also has little impact on the Win Rate. Therefore, in  
 69 our experiments,  $\alpha$  is set to 2.

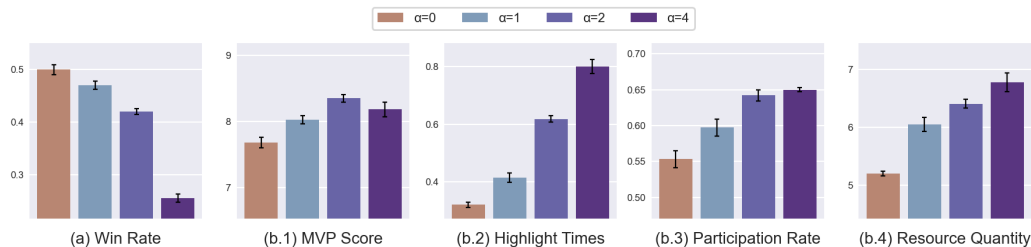

Figure 4: Influence of the balance parameter  $\alpha$ . Note that  $\alpha = 0$  means training without enhancement.

### 70 C.2 Adaptive Adjustment Mechanism

71 We implement an adaptive adjustment mechanism by simply utilizing the agent’s original value  
 72 network to measure the degree of completing the task goal. We first normalize the output of the  
 73 original value network and then set the task gate to 1 (enhancing the human) when the normalized  
 74 value is above the specified threshold  $\xi$ , and to 0 (completing the task) otherwise. The threshold  $\xi$   
 75 is used to control the timing of enhancement. The results of RLHG agents with different values of  $\xi$   
 76 are shown in Figure 5. We can see that as the threshold  $\xi$  increases, the Win Rate increases, and the  
 77 human model’s performance on individual goals decreases. In practical applications, the threshold  $\xi$   
 78 can be set according to human preference.

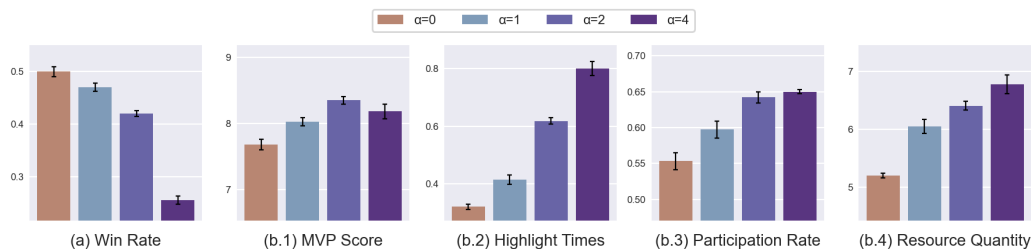

Figure 5: Influence of the threshold  $\xi$ . Note that  $\xi = 1$  means never enhancement, and  $\xi = 0$  means always enhancement.

## 79 **D Details of Human-Agent Collaboration Test**

### 80 **D.1 Ethical Review**

81 The ethics committee of a third-party organization conducted an ethical review of our project. They  
82 reviewed our experimental procedures and risk avoidance methods (see Appendix [D.1.3](#)). They  
83 believed that our project complies with the "New Generation of AI Ethics Code"<sup>1</sup> of the country  
84 to which the participants belonged (China), so they approved our study. In addition, all participants  
85 consented to the experiment and provided informed consent (see Appendix [D.1.1](#)) for the study.

#### 86 **D.1.1 Informed Consent**

87 All participants were told the following experiment guidelines before testing:

- 88 • This experiment is to study human-agent collaboration technology in MOBA games.
- 89 • Your identity information will not be disclosed to anyone.
- 90 • All game statistics are only used for academic research.
- 91 • You will be invited into matches where your opponents and teammates are agents.
- 92 • Your goal is to win the game as much as possible by collaborating with agent teammates.
- 93 • Your agent teammates will assist you in achieving your individual goals in the game.
- 94 • After each test, you can report your preference over the agent teammates.
- 95 • After each test, you may also voluntarily fill out a debriefing questionnaire to tell us your open-ended  
96 feedback about the agent teammates.
- 97 • Each game lasts 10-20 minutes.
- 98 • You may voluntarily choose whether to take the test. You can terminate the test at any time if you  
99 feel unwell during the test.
- 100 • At any time, if you want to delete your data, you can contact the game provider directly to delete it.

101 If participants volunteer to take the test, they will first provide written informed consent, then we  
102 will provide them with the equipment and game account, and explain the experimental details on the  
103 screen.

#### 104 **D.1.2 Screenshots**

105 Screenshots of detailed experimental instructions are shown below.

- 106 1. Read tutorial and instruction on the study and gameplay. (Figure [6](#))
- 107 2. Read the detailed test content and precautions. (Figure [7](#))
- 108 3. Play the game with agents until the game is complete. (Figure [8](#))
- 109 4. Answer questions about perceptions and preferences.(Figure [9](#), [10](#), [11](#), and [12](#))
- 110 5. Volunteer to complete a debriefing questionnaire regarding open-ended feedback from your  
111 agent teammates. (Figure [13](#))
- 112 6. Repeat steps [3](#), [4](#), and [5](#) for a total of 20 times.

113 After the participant has read it carefully and confirmed complete understanding, the test will begin.

---

<sup>1</sup>China: MOST issues New Generation of AI Ethics Code, <https://www.dataguidance.com/news/china-most-issues-new-generation-ai-ethics-code>

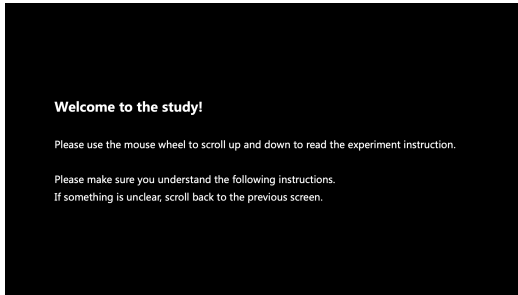

(a) Welcome participants to the experiment.

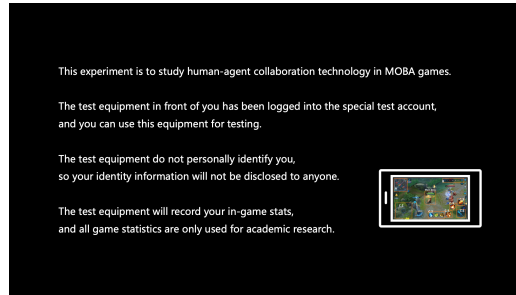

(b) Introduce test equipment.

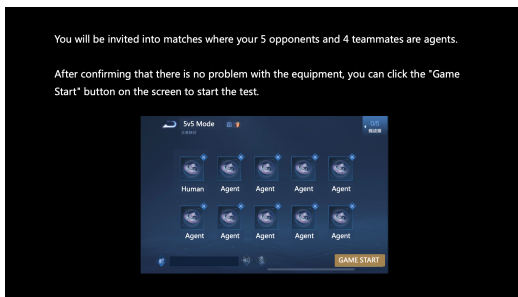

(c) Introduces test mode.

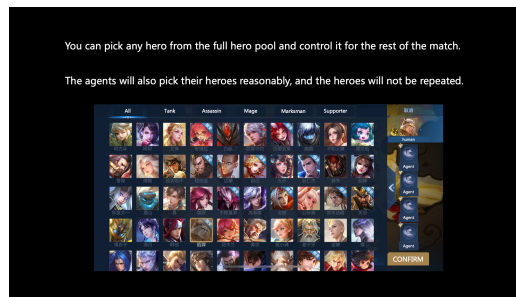

(d) Introduce participant's controllable hero.

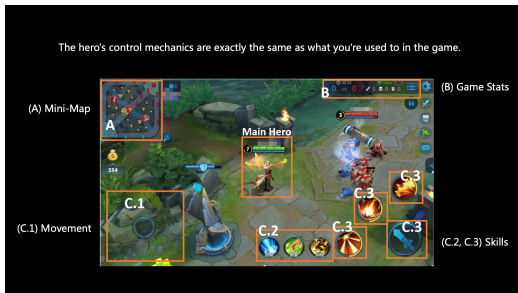

(e) Introduce the control mechanism.

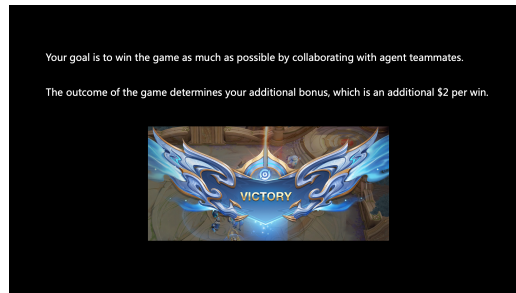

(f) Explain the task goal of the game.

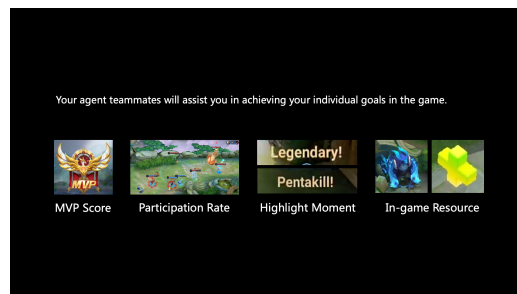

(g) Explain the enhanced individual goals.

Figure 6: Screenshots of tutorial and instruction screens.

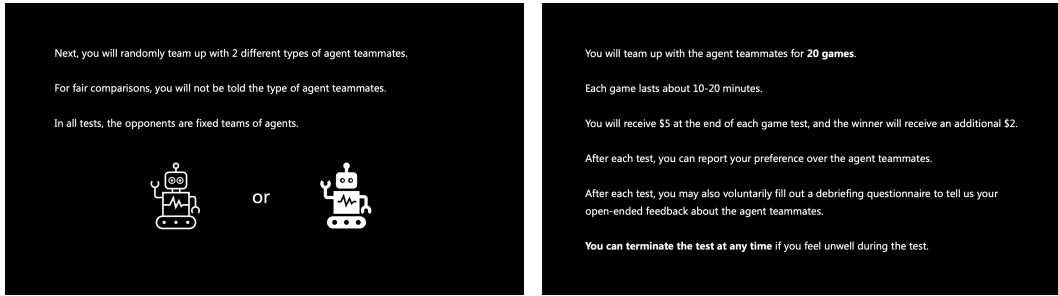

(a) Introduce agent teammates and opponents. (b) Describe testing requirements and compensation.

Figure 7: Screenshot of experiment content.

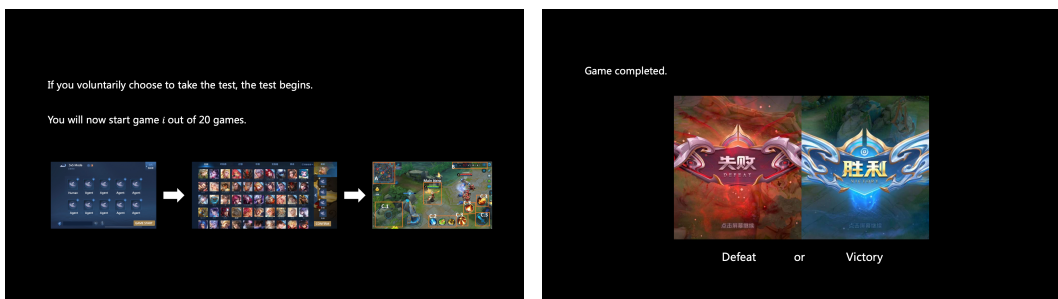

(a) Repeat the following process to test. (b) Confirm completion of each test.

Figure 8: Screenshots of each test.

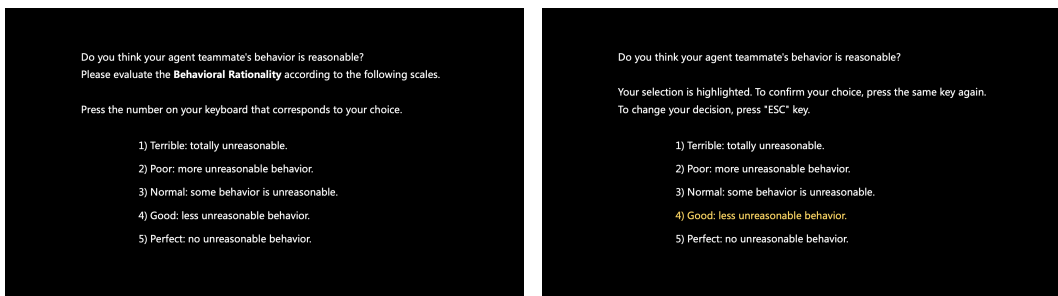

(a) Elicit participant's preference. (b) Confirm participant's preference.

Figure 9: Screenshots of Behavioral Rationality elicitation over each test.

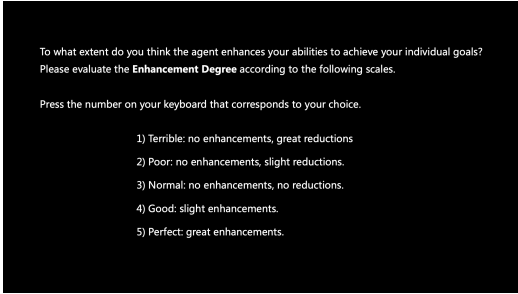

(a) Elicit participant's preference.

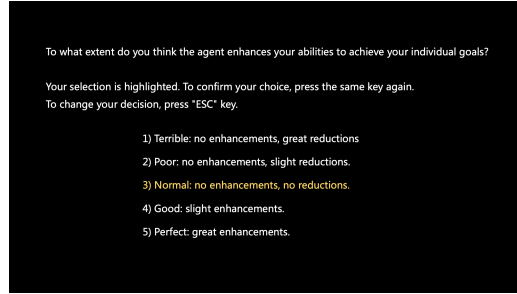

(b) Confirm participant's preference.

Figure 10: Screenshots of Enhancement Degree elicitation over each test.

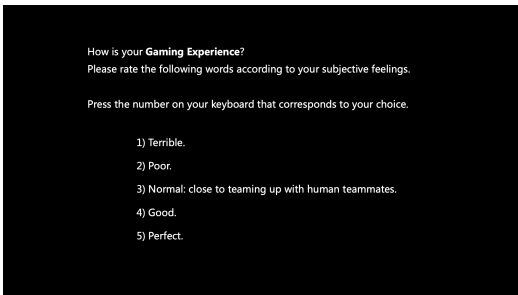

(a) Elicit participant's preference.

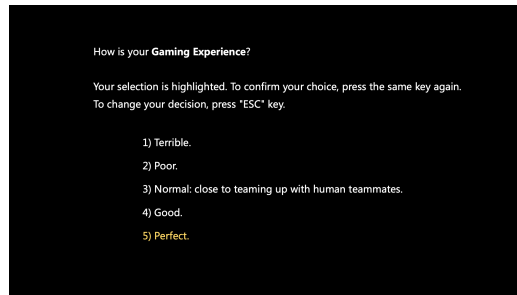

(b) Confirm participant's preference.

Figure 11: Screenshots of Gaming Experience elicitation over each test.

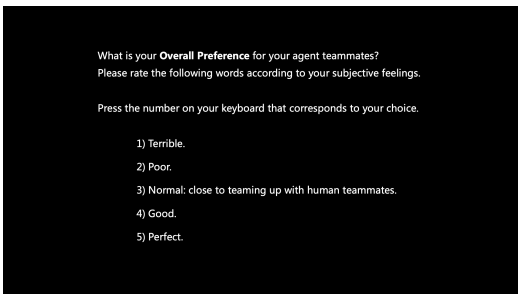

(a) Elicit participant's preference.

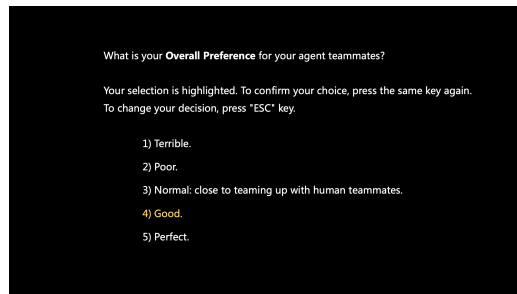

(b) Confirm participant's preference.

Figure 12: Screenshots of Overall Preference elicitation over each test.

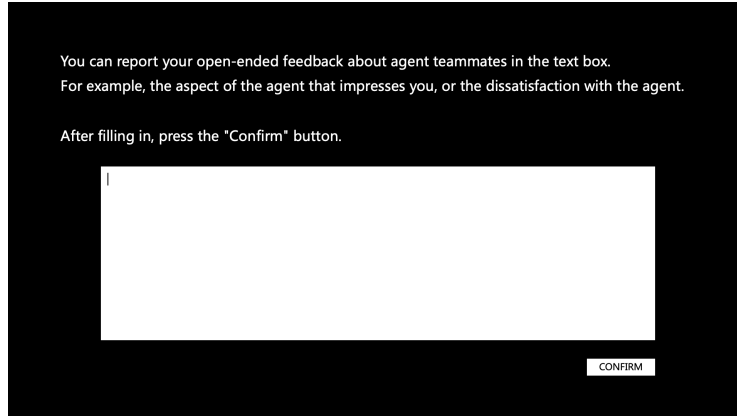

Figure 13: Screenshot of open-ended feedback about the agent teammates from debrief questionnaire.

### 114 D.1.3 Potential Participant Risks

115 First, we analyze the risks of this experiment to the participants. The potential participant risks of the  
 116 experiment mainly include the leakage of identity information and the time cost. And we have taken  
 117 a series of measures to minimize these risks.

118 **Identity Information.** A series of measures have been taken to avoid this risk:

- 119 • All participants will be recruited with the help of a third party (the game provider of *Honor of*  
 120 *Kings*), and we do not have access to participants' identities.
- 121 • We make a risk statement for participants and sign an identity information confidentiality agreement  
 122 under the supervision of a third party.
- 123 • We only use unidentifiable game statistics in our research, which are obtained from third parties.
- 124 • Special equipment and game accounts are provided to the participants to prevent equipment and  
 125 account information leakage.
- 126 • The identity information of all participants is not disclosed to the public.

127 **Time Cost.** We will pay participants to compensate for their time costs. Participants receive \$5  
 128 at the end of each game test, and the winner will receive an additional \$2. Each game test takes  
 129 approximately 10 to 20 minutes, and participants can get about an average of \$20 an hour.

## 130 D.2 Experimental Details

### 131 D.2.1 Participant Details

132 To conduct our experiments, we communicated with the game provider and obtained testing authoriza-  
 133 tion. The game provider assisted in recruiting 30 experienced participants with anonymized personal  
 134 information, which comprised 15 high-level (top 1%) and 15 general-level (top30%) participants. All  
 135 participants have more than three years of experience in *Honor of Kings* and promise to be familiar  
 136 with all mechanics in the game.

137 And special equipment and game accounts are provided to each participant to prevent equipment and  
 138 account information leakage. The game statistics we collect are only for experimental purposes and  
 139 are not disclosed to the public.

### 140 D.2.2 Experimental Design

141 We used a within-participant design for the experiment: each participant teams up with four agents.  
 142 This design allowed us to evaluate both objective performances as well as subjective preferences.  
 143 All participants read detailed guidelines and provided informed consent before the testing. Each  
 144 participant tested 20 matches. Each participant is asked to randomly team up with two different  
 145 types of agents: the Wukong agent and the RLHG agent. After each test, participants reported their

146 preference over their agent teammates. For fair comparisons, participants were not told the type of  
 147 their agent teammates. The human model-agent team (4 Wukong agents plus 1 human model) was  
 148 adopted as the fixed opponent for all tests.

149 In addition, as mentioned in [Ye et al. \(2020\)](#); [Gao et al. \(2021\)](#), the response time of agents is usually  
 150 set to 193ms, including observation delay (133ms) and response delay (60ms). The average APM of  
 151 agents and top e-sport players are usually comparable (80.5 and 80.3, respectively). To make our  
 152 test results more accurate, we adjusted the agents' capability to match the performance of high-level  
 153 humans by increasing the observation delay (from 133ms to 200ms) and response delay (from 60ms  
 154 to 120 ms).

### 155 D.2.3 Participant Survey Description

156 We designed an IRB-approved participant survey on what top 5 goals participants want to achieve  
 157 in-game. The participant survey contains 8 initial goals, including Game Victory, High MVP Score,  
 158 More Highlights, More Kill Counts, Few Death Counts, High Participation, More Resources, and  
 159 More Visible Information. Each participant can vote up to 5 non-repeating goals, and can also add  
 160 additional goals. 30 participants voluntarily participated in the voting, and the result is shown in  
 161 Figure 14.

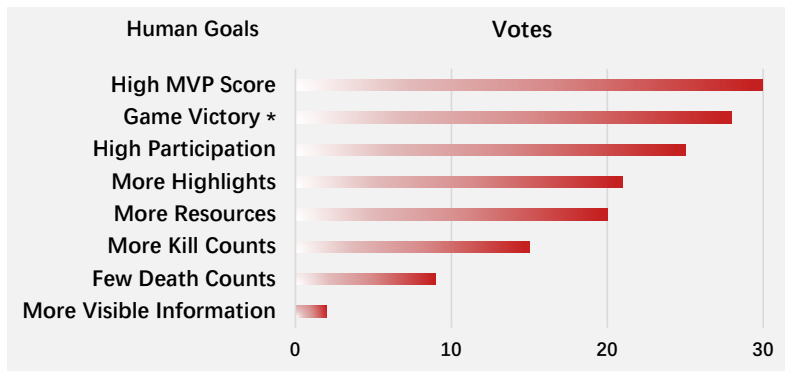

Figure 14: Voting results on human goals in *Honor of Kings*, based on statistics from our participant survey.

### 162 D.2.4 Preference Description

163 After each test, participants gave scores on several subjective preference metrics to evaluate their  
 164 agent teammates, including the **Behavioral Rationality**: the reasonableness of the agent's behavior,  
 165 the **Enhancement Degree**: the degree to which the agent enhances your abilities to achieve your  
 166 goals, the **Gaming Experience**: your overall gaming experience, and the **Overall Preference**: your  
 167 overall preference for your agent teammates.

168 For each metric, we provide a detailed problem description and a description of the reference scale  
 169 for the score. Participants rated their agent teammates based on how well their subjective feelings  
 170 matched the descriptions in the test. The different metrics are described as follows:

- 171 • For the Behavioral Rationality, "Do you think your agent teammate's behavior is reasonable?  
 172 Please evaluate Behavioral Rationality according to the following scales."  
 173 1) Terrible: totally unreasonable.  
 174 2) Poor: more unreasonable behavior.  
 175 3) Normal: some behavior is unreasonable.  
 176 4) Good: less unreasonable behavior.  
 177 5) Perfect: no unreasonable behavior.
- 178 • For the Enhancement Degree, "To what extent do you think the agent enhances your abilities to  
 179 achieve your individual goals? Please evaluate the Enhancement Degree according to the following  
 180 scales."  
 181 1) Terrible: no enhancements, great reductions.

- 182 2) Poor: no enhancements, slight reductions.  
 183 3) Normal: no enhancements, no reductions.  
 184 4) Good: slight enhancements  
 185 5) Perfect: great enhancements.
- 186 • For the Gaming Experience, "How is your gaming experience? Please rate the following words  
 187 according to your subjective feelings."  
 188 1) Terrible.  
 189 2) Poor.  
 190 3) Normal: close to teaming up with human teammates.  
 191 4) Good.  
 192 5) Perfect.
- 193 • For the Overall Preference, "What is your overall preference for your agent teammates? Please rate  
 194 the following words according to your subjective feelings."  
 195 1) Terrible.  
 196 2) Poor.  
 197 3) Normal: close to teaming up with human teammates.  
 198 4) Good.  
 199 5) Perfect.

Table 6: The subjective preference results (95% confidence intervals) of all participants in the Human-Agent Game Tests.

| Participant Preference Metrics<br>(from terrible to perfect, 1~5) | Participant Level | Type of Agent |                    |
|-------------------------------------------------------------------|-------------------|---------------|--------------------|
|                                                                   |                   | Wukong        | RLHG               |
| Behavioral Rationality                                            | General-level     | 2.03 ± 0.31   | <b>3.60</b> ± 0.30 |
|                                                                   | High-level        | 2.81 ± 0.21   | <b>4.06</b> ± 0.30 |
| Enhancement Degree                                                | General-level     | 2.10 ± 0.40   | <b>3.50</b> ± 0.24 |
|                                                                   | High-level        | 2.94 ± 0.21   | <b>4.14</b> ± 0.25 |
| Gaming Experience                                                 | General-level     | 2.40 ± 0.41   | <b>4.01</b> ± 0.30 |
|                                                                   | High-level        | 3.06 ± 0.27   | <b>4.22</b> ± 0.30 |
| Overall Preference                                                | General-level     | 2.65 ± 0.35   | <b>3.95</b> ± 0.28 |
|                                                                   | High-level        | 3.06 ± 0.21   | <b>4.19</b> ± 0.29 |

## 200 D.2.5 Additional Subjective Preference Results

201 Detailed subjective preference statistics are presented in Table 6. We can see that both high-level and  
 202 general-level participants preferred the RLHG agent over the Wukong agent.

203 **Behavioral Rationality.** We can see that the Behavioral Rationality of the Wukong agent was lower  
 204 than normal, indicating that participants believed that most of the behaviors of the Wukong agent  
 205 lacked rationality. The participants generally believed that the behavior of the RLHG agent was more  
 206 reasonable, therefore they scored the RLHG agent more than normal.

207 **Enhancement Degree.** Participants believed that the Wukong agent did not bring them any effective  
 208 enhancement, while they believed that the RLHG agent effectively enhanced their abilities to achieve  
 209 their individual goals.

210 **Gaming Experience.** Participants agreed that effective enhancement gave them a good gaming  
 211 experience, while the irrational behavior of the Wukong agent degraded their gaming experience.

212 **Overall Preference.** In general, participants were satisfied with the RLHG agent and gave higher  
 213 scores in the Overall Preference metric. The results of these subjective preference metrics are also  
 214 consistent with the results of objective performance metrics, further verifying the effectiveness of the  
 215 RLHG method.



## 216 D.2.6 Participant Comments

217 After each game test, participants provided voluntary feedback on their agent teammates. Some  
218 participants commented on the RLHG agent "Teaming up with the agent (RLHG) as teammates  
219 makes me feel good, they helped me achieve a higher MVP score" and "The agent teammates (RLHG)  
220 proactively considered my in-game needs, assisted me in building advantages, and provided the  
221 resources I required". Other participants provided feedback on the Wukong agent, stating that "The  
222 agent (Wukong) brought me a less enjoyable experience, as they rarely paid attention to my gameplay  
223 behavior" and "My agent teammates (Wukong) frequently left me feeling isolated and undervalued".  
224 Such voluntary feedback from participants can offer insights into the effectiveness of the RLHG  
225 method.

## 226 E Broader Impacts

227 The main goal of our research is to develop better technologies that enable artificial agents to assist  
228 humans more effectively in complex environments. This technology has the potential to benefit the  
229 research community and various real-world applications, such as friendly assistive robots.

230 **To the research community.** Games, as the microcosm of real-world problems, have been widely  
231 used as testbeds to evaluate the performance of Artificial Intelligence (AI) techniques for decades.  
232 And MOBA poses a great challenge to the AI community, especially in the field of Human-Agent  
233 Collaboration (HAC). Even though the existing MOBA-game AI systems have achieved or even  
234 exceeded human-level performance, they mainly focus on how to compete rather than how to assist  
235 humans, leaving HAC in complex environments still to be investigated. To this end, this paper  
236 introduces a learning methodology to train agents to assist humans and enhance humans' ability to  
237 achieve goals in complex human-agent teaming environments. We herewith expect that this work can  
238 provide inspiration for the human enhancement and human assistance in various AI research.

239 **To the real-world applications.** Firstly, our AI has found real-world applications in games and  
240 is changing the way MOBA game designers work. For example, for PVE (player vs environment)  
241 teaching mode, introducing AI with human enhancement into the game is a low-cost method to  
242 increase the interest of novice players. Secondly, our method can be directly applied to any pre-  
243 trained agent, and only needs to be fine-tuned with human gain to change it from apathetic to  
244 human-enhanced. It could be directly applied to assistive robotics, such as enhancing the safety of  
245 humans in collaboration with industrial robotic arms.

246 However, we should take into consideration the possibility of human goals being harmful. Therefore,  
247 if agents are optimized for harmful goals, this can have negative social impacts, as with all advanced  
248 AI techniques, such as AlphaStar (Vinyals *et al.*, 2019), OpenAI Five (OpenAI *et al.*, 2019) and  
249 Cicero ((FAIR)† *et al.*, 2022). To avoid these problems, we increase regulation and scrutiny during  
250 technological research and development to ensure that human goals do not negatively impact society.  
251 In addition, we recommend that when releasing the pre-trained agent model, some restrictions need  
252 to be added for fine-tuning, such as enhancing the safety of humans.

## 253 References

- 254 Tianqi Chen, Ian Goodfellow, and Jonathon Shlens. Net2net: Accelerating learning via knowledge  
255 transfer. *arXiv preprint arXiv:1511.05641*, 2015.
- 256 Meta Fundamental AI Research Diplomacy Team (FAIR)†, Anton Bakhtin, Noam Brown, Emily  
257 Dinan, Gabriele Farina, Colin Flaherty, Daniel Fried, Andrew Goff, Jonathan Gray, Hengyuan Hu,  
258 et al. Human-level play in the game of diplomacy by combining language models with strategic  
259 reasoning. *Science*, 378(6624):1067–1074, 2022.
- 260 Yiming Gao, Bei Shi, Xueying Du, Liang Wang, Guangwei Chen, Zhenjie Lian, Fuhao Qiu, Guoan  
261 Han, Weixuan Wang, Deheng Ye, et al. Learning diverse policies in moba games via macro-goals.  
262 *Advances in Neural Information Processing Systems*, 34:16171–16182, 2021.
- 263 Sepp Hochreiter and Jürgen Schmidhuber. Long short-term memory. *Neural Computation*, 9(8):1735–  
264 1780, 1997.

- 265 Diederik P Kingma and Jimmy Ba. Adam: A method for stochastic optimization. *arXiv preprint*  
266 *arXiv:1412.6980*, 2014.
- 267 OpenAI, Christopher Berner, Greg Brockman, Brooke Chan, Vicki Cheung, Przemysław Dębniak,  
268 Christy Dennison, David Farhi, Quirin Fischer, Shariq Hashme, Chris Hesse, Rafal Józefowicz,  
269 Scott Gray, Catherine Olsson, Jakub Pachocki, Michael Petrov, Henrique Pondé de Oliveira Pinto,  
270 Jonathan Raiman, Tim Salimans, Jeremy Schlatter, Jonas Schneider, Szymon Sidor, Ilya Sutskever,  
271 Jie Tang, Filip Wolski, and Susan Zhang. Dota 2 with large scale deep reinforcement learning.  
272 *arXiv preprint arXiv:1912.06680*, 2019.
- 273 Oriol Vinyals, Igor Babuschkin, Wojciech M Czarnecki, Michaël Mathieu, Andrew Dudzik, Junyoung  
274 Chung, David H Choi, Richard Powell, Timo Ewalds, Petko Georgiev, et al. Grandmaster level in  
275 starcraft ii using multi-agent reinforcement learning. *Nature*, 575(7782):350–354, 2019.
- 276 Deheng Ye, Guibin Chen, Wen Zhang, Sheng Chen, Bo Yuan, Bo Liu, Jia Chen, Zhao Liu, Fuhao  
277 Qiu, Hongsheng Yu, et al. Towards playing full moba games with deep reinforcement learning.  
278 *Advances in Neural Information Processing Systems*, 33:621–632, 2020.
